1 **Microtubule inhibitors enhance DNA transfection**  
2 **efficiency through autophagy receptor p62/SQSTM1**

3  
4 Megumi Tsuchiya<sup>1#</sup>, Hidesato Ogawa<sup>1#\*</sup>, Kento Watanabe<sup>1</sup>, Takako Koujin<sup>2</sup>, Chie  
5 Mori<sup>2</sup>, Kazuto Nunomura<sup>3</sup>, Bangzhong Lin<sup>3</sup>, Akiyoshi Tani<sup>3</sup>, Yasushi Hiraoka<sup>1,2</sup>, and  
6 Tokuko Haraguchi<sup>1,2\*</sup>

7  
8 <sup>1</sup>Graduate School of Frontier Biosciences, Osaka University, 1-3 Yamadaoka, Suita  
9 565-0871, Japan

10 <sup>2</sup>Advanced ICT Research Institute Kobe, National Institute of Information and  
11 Communications Technology, 588-2 Iwaoka, Iwaoka-cho, Nishi-ku, Kobe 651-2492,  
12 Japan

13 <sup>3</sup>Graduate School of Pharmaceutical Science, Osaka University, 1-6 Yamadaoka, Suita  
14 565-0871, Japan

15 # These authors contributed equally to this manuscript.

16  
17 \*Correspondence should be addressed to:

18 Hidesato Ogawa, Tel: +81 668794621; Fax: +81 668794622

19 E-mail address: [hidesato@fbs.osaka-u.ac.jp](mailto:hidesato@fbs.osaka-u.ac.jp)

20 Tokuko Haraguchi, Tel: +81 668794621; Fax: +81 668794622

21 E-mail address: [haraguchi@fbs.osaka-u.ac.jp](mailto:haraguchi@fbs.osaka-u.ac.jp)

22

23 **Short title:** Tubulin inhibitors enhance transfection efficiency

24 ***Abstract***

25 Ectopic gene expression is an indispensable tool in biology and medicine. However, it  
26 is often limited by the low efficiency of DNA transfection. It is known that depletion of  
27 p62/SQSTM1 enhances DNA transfection efficiency by preventing the degradation of  
28 transfected DNA. Therefore, p62 is a potential target of drugs to increase transfection  
29 efficiency. To identify drugs that enhance transfection efficiency, a non-biased high-  
30 throughput screening was applied to over 4,000 compounds from the Osaka University  
31 compound library, and their p62-dependency was evaluated. The top-scoring drugs  
32 were mostly microtubule inhibitors, such as colchicine and vinblastine, and all of them  
33 showed positive effects only in the presence of p62. To understand the mechanisms, the  
34 time of p62-dependent ubiquitination was examined using polystyrene beads that were  
35 introduced into cells as materials that mimicked transfected DNA. The microtubule  
36 inhibitors caused a delay in the ubiquitination. Furthermore, the level of phosphorylated  
37 p62 at S405, which is required for ubiquitination during autophagosome formation,  
38 markedly decreased in the drug-treated cells. These results suggest that microtubule  
39 inhibitors inhibit p62-dependent autophagosome formation. Our findings provide new  
40 insights into the mechanisms of DNA transfection and also provide a solution to  
41 increase DNA transfection efficiency.

42

43 **Keywords:** high-throughput screening; autophagy; LC3; p62; phosphorylation;  
44 ubiquitination; gene delivery

45

46 **Abbreviations:** ATG, autophagy-related gene; CK2, Casein kinase 2; GAPDH,  
47 glyceraldehyde 3-phosphate dehydrogenase; GFP, green fluorescent protein; HDAC6,

48 histone deacetylase 6; KO, knockout; LC3, microtubule-associated protein light chain 3;  
49 MEF, murine embryonic fibroblast; NF- $\kappa$ B, nuclear factor-kappa B; TBK1, TANK-  
50 binding kinase 1; ULK1, Unc-51 like autophagy activating kinase1; WIPI1, WD repeat  
51 domain phosphoinositide-interacting protein 1  
52

## 53 ***Introduction***

54 Gene delivery is one of the most important steps for gene therapy and genetic  
55 modification in basic science. Gene therapy has great potential in clinical medicine, and  
56 this concept has become well established in therapeutic approaches. In basic science,  
57 DNA transfection is a powerful tool that enables the study of gene functions and their  
58 products in cells.

59 In the gene delivery process, endocytosis is a crucial pathway for the  
60 regulation of cellular uptake of plasmid DNA<sup>1-3</sup>. Importantly, endocytosis can promote  
61 the induction of selective autophagy, also called xenophagy<sup>4</sup>. Generally, autophagy is a  
62 cytosolic bulk degradation pathway for recycling biomolecules through nonspecific  
63 degradation of proteins and organelles under nutrient starvation conditions. In contrast,  
64 selective autophagy plays an important defensive role against cellular infection by  
65 pathogens, as part of a starvation-independent autophagic defense system<sup>5-7</sup>. The  
66 conjugation of ubiquitin (Ub) to target pathogens is an initial and important process in  
67 selective autophagy. Ubiquitination assists in the recruitment of autophagy receptor  
68 proteins, including p62/sequestosome-1 (p62/SQSTM1), against pathogens or  
69 transfected DNA<sup>4, 8-11</sup>. Therefore, suppression of the autophagy pathway can be a target  
70 for drugs to increase transfection efficiency.

71 We have reported that the depletion of p62/SQSTM1 protein (hereafter  
72 designated p62) greatly increases the efficiency of DNA transfection in cultured cells<sup>11</sup>.  
73 To monitor the behavior of the transfected DNA, we developed an experimental system  
74 using DNA-conjugating beads that mimic the transfected DNA. In this system, DNA-  
75 conjugated beads together with pHrodo, a fluorescent marker for endosome rupture, are  
76 incorporated into cells and their intracellular dynamics are analyzed in a live cell<sup>11</sup>.

77 Using this system, we demonstrated that the transfected DNA is incorporated into cells  
78 through endocytosis, released into the cytosol from the endosomes, and entrapped via  
79 autophagy in a p62-dependent manner. Furthermore, we demonstrated that the  
80 recruitment of Ub around the transfected material is significantly delayed in p62 gene-  
81 knockout murine embryonic fibroblast (p62KO-MEF) cells compared with that in  
82 normal MEF cells<sup>12</sup>. Additionally, the phosphorylation of S405 (human S403) of p62 is  
83 a crucial step for the recruitment of Ub to the target site of transfected materials that  
84 mimic ectopic DNA<sup>11</sup>. Hence, phosphorylation of S405 of p62 is an essential step for  
85 transfection-induced selective autophagy<sup>12</sup>. Since p62 plays an important role in gene  
86 delivery through initial ubiquitination of the transfected DNA, inhibition of p62 may  
87 increase transfection efficiency. The aim of this study was to identify a small chemical  
88 compound that blocks the initial step of p62-dependent selective autophagy to enhance  
89 DNA transfection efficiency in mammalian cells.

90

## 91 ***Results***

### 92 ***High-throughput screening for drugs enhancing transfection efficiency***

93 To identify potential compounds that can enhance transfection efficiency, high-  
94 throughput screening based on a luciferase assay was performed on MEF cells using an  
95 automated workstation. MEF cells were seeded in 384-well plates and incubated for 18  
96 h with each compound from the Osaka University compound library (4,400  
97 compounds)<sup>13</sup>, at a final concentration of 10  $\mu$ M. As a negative control, DMSO (at a  
98 final concentration of 1%) was used instead of the compounds. The cells were  
99 transfected with the pCMV-Luc plasmid and incubated for 28 h; luciferase gene  
100 expression was driven by the cytomegalovirus immediate early (CMV-IE) promoter in

101 this plasmid. After cell viability assay, a luciferase reporter assay was carried out (Fig.  
102 1A). Among the 4,400 compounds tested, 160 had severe effects on cell viability and  
103 were therefore removed from further analysis. For the remaining 4,240 compounds, cell  
104 viability in the presence of each compound was more than 96%. The transfection  
105 efficiency of the cells treated with each compound is plotted in Fig. 1B, the luciferase  
106 activity was normalized to cell viability. In this first screening, out of the 4,240 tested  
107 compounds, we identified 87 compounds that increased luciferase activity compared  
108 with the negative control (approximately 2.1% positive hit rate). The cutoff value used  
109 for selection was the mean value of the DMSO control + 4 × standard deviation (SD)  
110 (mean 0.347, SD = 0.242).

111 The activity of these 87 compounds was further analyzed via a second  
112 screening using MEF cells cultured in 96-well plates and incubated for 16 h with each  
113 of these compounds at a concentration of 1 μM. The luciferase reporter assay showed  
114 that the transfection efficiency increased in the presence of each of these compounds,  
115 with a range of approximately 2- to 260-fold that of the control, DMSO (Fig. 2A). This  
116 result indicates that all the 87 compounds exhibit a transfection-enhancing activity  
117 (Table S1). Among these, 14 were microtubule inhibitors. Notably, the top 10  
118 compounds were all microtubule inhibitors, including colchicine and vinblastine (Fig.  
119 2B).

120

### 121 ***Microtubule inhibitors enhance gene transfection efficiency***

122 To further evaluate the effects of these compounds on DNA transfection efficiency, we  
123 selected two well-used microtubule inhibitors: colchicine and vinblastine. These were  
124 ranked second and third, respectively, in the 2<sup>nd</sup> screening (Fig. 2A). Firstly, we

125 examined the dose-dependency of these inhibitors in MEF cells (Fig. 2C). Cells were  
126 treated with colchicine or vinblastine at various concentrations, and transfected with the  
127 pCMV-Luc DNA plasmid. The luciferase activity was then measured. The transfection  
128 efficiency increased in a chemical dose-dependent manner in the MEF cells (Fig. 2C).  
129 Statistical analysis showed that the EC<sub>50</sub> of colchicine and vinblastine was 239.1 and  
130 26.29 nM, respectively, in the MEF cells (Fig. 2C). Furthermore, we evaluated the  
131 transfection efficiency by measuring the fluorescence level of the GFP expressed in the  
132 MEF cells. There were greater numbers of GFP-positive cells among the MEF cells  
133 treated with colchicine or vinblastine than among the DMSO-treated control cells (Fig.  
134 2D). These results suggest that treatment with colchicine and vinblastine can enhance  
135 transfection efficiency.

136           It has been reported that depolymerization of microtubules activates the  
137 transcription factor, NF- $\kappa$ B, and induces NF- $\kappa$ B-dependent gene expression<sup>14</sup>.  
138 Therefore, it is possible that treatment with microtubule inhibitors may induce the  
139 activation of gene expression through NF- $\kappa$ B activation. In fact, the CMV promoter,  
140 which is used in the pCMV-Luc plasmid, possesses an NF- $\kappa$ B binding site<sup>14, 15</sup>;  
141 therefore, this can affect luciferase gene expression via promoter activation. To test this  
142 possibility, we established a cell line (MEF-LUC cells) with a CMV-driven luciferase  
143 plasmid integrated into the genome. These cells were treated with colchicine or  
144 vinblastine for 16 h, and the levels of luciferase activity were measured in the presence  
145 and absence of colchicine or vinblastine (Fig. S1). Treatment with colchicine showed  
146 only a slight increase in luciferase gene expression, and its fold-increase was much  
147 lower than that of DNA transfection (Fig. S1; compare with Fig. 2C). Treatment with  
148 vinblastine also showed a similar result, with almost no increase in luciferase

149 expression. These results suggest that colchicine and vinblastine affect transfection  
150 efficiency, but not by enhancing promoter activity.

151

### 152 ***Transfection enhancement occurs in the presence of autophagy receptor p62***

153 Since p62 acts as an inhibitory factor for DNA transfection<sup>11</sup>, the transfection-  
154 enhancing activity of tested compounds may be deduced by the invalidation of the p62-  
155 dependent autophagic pathway. Based on this hypothesis, we examined the activity of  
156 the 87 compounds at a concentration of 1  $\mu$ M in p62KO-MEF cells under the same  
157 condition as in Fig. 2A (Fig. 3A). All of them exhibited no or little transfection-  
158 enhancing activity in p62KO-MEF cells (Fig. 3A). As microtubule inhibitors  
159 (compounds 1-10 in Figs. 2A, 2B and 3A) seemed to show slight increase of  
160 transfection enhancing activity, we further tested colchicine and vinblastine for  
161 transfection-enhancing activity at various concentrations from 15.6 to 2000 nM (Figs.  
162 3B and 3C), and found that these two microtubule inhibitors did not show transfection-  
163 enhancing activity at any of the concentrations tested in those cells (Fig. 3B and 3C).  
164 This result suggests that microtubule inhibitors function in a p62-dependent autophagic  
165 pathway. This is consistent with the recruitment of microtubule-associated protein  
166 1A/1B-light chain 3 (LC3; also called ATG8), a marker protein for autophagosome, to  
167 transfected DNA, which occurs in a p62-dependent manner<sup>11</sup>.

168

### 169 ***p62-dependent ubiquitination is delayed by microtubule inhibitors***

170 To understand the molecular mechanisms of the p62-dependent enhancement of  
171 transfection efficiency by colchicine and vinblastine, we employed an experimental  
172 method using polystyrene beads that had been developed to monitor the behavior of the



173 transfected DNA<sup>16</sup> (Fig. 4A). In this method, the beads are incorporated into cells with  
174 transfection reagents via endocytosis and enter the cytosol after rupture of the  
175 endosomal membrane. The beads that appeared in the cytosol were targeted for  
176 autophagy, similar to the transfected DNA<sup>16, 17</sup> (Fig. 4A). To monitor them in living  
177 cells, the beads were pre-conjugated with pHrodo dye, which emits fluorescence under  
178 acidic pH conditions, such as in the acidic endosome, but not in the cytosol. This dye,  
179 therefore, serves as a marker of endosome membrane rupture, as described previously<sup>16</sup>.  
180 The pHrodo-conjugated beads were incorporated into MEF cells expressing a GFP-  
181 fused Ub protein (GFP-Ub MEF cells)<sup>12</sup>, and the assembly of GFP-Ub around the beads  
182 was observed in a living cell using time-lapse fluorescence microscopy (Fig. 4B). In the  
183 control DMSO-treated cells, the time for Ub recruitment to the beads was  
184 approximately 3–4 min (Fig. 4B, middle panel) after pHrodo fluorescence disappeared  
185 (Fig. 4B, upper panel). In contrast, the time for GFP-signal accumulation was 9–10 min  
186 in 500 nM colchicine-treated MEF cells (Fig. 4C, middle panel), which was longer than  
187 that in the control cells (Fig. 4B). Statistical analysis was performed to determine the  
188 timing of GFP-signal accumulation around the beads after the loss of pHrodo signals in  
189 cells expressing GFP-Ub with or without the inhibitor (Fig. 4D). It showed that, in the  
190 DMSO-treated cells, the time for Ub recruitment to the beads was ~4 min (median) after  
191 pHrodo fluorescence disappeared (mean and SD,  $4.167 \pm 1.88$  min,  $n = 24$  beads; lane 1  
192 in Fig. 4D). Moreover, the timing of GFP-signal accumulation was ~6 min (median) in  
193 100 nM colchicine-treated MEF cells (mean and SD:  $8.286 \pm 8.36$  min,  $n = 28$  beads:  
194 lane 2 in Fig. 4D), ~11 min (median) in 500 nM colchicine-treated MEF cells (mean  
195 and SD:  $11.32 \pm 11.30$  min,  $n = 22$  beads: lane 3 in Fig. 4D), and ~6 min (median) in  
196 the vinblastine-treated MEF cells (mean and SD:  $6.48 \pm 3.81$  min,  $n = 31$  beads; lane 4

197 in Fig. 4D). Additionally, the GFP-Ub signals did not accumulate within 60 min in  
198 colchicine- or vinblastine-treated GFP-Ub MEF cells (these beads were not counted and  
199 were not included in the  $n$ ; upper coloum in Fig. 4D). These results show that GFP-Ub  
200 accumulation to the beads is significantly delayed in the colchicine- or vinblastine-  
201 treated MEF cells, and also suggest that intact microtubules are important for the  
202 recruitment of Ub to the target sites.

203

#### 204 ***The active form of p62 is suppressed by microtubule inhibitors***

205 It has been reported that the phosphorylated form of p62 at the amino acid residue S405  
206 (p62 S405) is required for Ub recruitment in the process of selective autophagy<sup>12</sup>.  
207 Therefore, Ub recruitment can be delayed by a decrease in the level of phosphorylated  
208 p62 at S405. To test this idea, we performed Western blot analysis to evaluate total p62  
209 protein levels and p62 S405 phosphorylation levels (Fig. 5). Before DNA transfection  
210 (0 h), the p62 S405 phosphorylation levels were very low. However, after transfection  
211 (24 h), these levels greatly increased in DMSO-treated MEF cells, although the p62  
212 levels remained unchanged. This suggests that DNA transfection induces an increase in  
213 p62 S405 phosphorylation. In the MEF cells treated with colchicine or vinblastine,  
214 however, the levels of p62 S405 phosphorylation decreased. This suggests that  
215 microtubule inhibitors inhibit Ub recruitment by decreasing the level of phosphorylated  
216 p62 S405, which is required for Ub recruitment in selective autophagy. This implies  
217 that microtubule inhibitors are responsible for the delay in Ub recruitment and therefore  
218 increase transfection efficiency in MEF cells.

219

#### 220 ***Discussion***

221 ***Microtubule structure/function and transfection efficiency***

222 In this study, we used a non-biased, high-throughput screening approach to identify  
223 small chemical compounds that increase DNA transfection efficiency. The top 10  
224 compounds were all microtubule inhibitors. Therefore, inhibition of the microtubule  
225 structure or function seems to trigger an increase in transfection efficiency. This finding  
226 is consistent with previous reports on cultured vascular smooth muscle cells and CV-1  
227 cells, in which microtubule inhibitors, such as colchicine, vinblastine, vincristine,  
228 nocodazole, and podophyllotoxin, increased the transfection efficiency<sup>15, 18</sup>.  
229 Interestingly, some reports showed that microtubule-polymerizing agents, such as  
230 paclitaxel, also increased the transfection efficiency in COS-7 and A549 cells<sup>19, 20</sup>. The  
231 polymerizing agent, docetaxel, a chemical compound closely related to paclitaxel, was  
232 included in our screening results for the top 10 compounds (Fig. 2B, Rank 7).  
233 Moreover, tubulin deacetylation inhibitors, such as HDAC6 inhibitors, also increased  
234 the transfection efficiency in A549 cells, TC7 cells, and mesenchymal stem cells<sup>21-23</sup>.  
235 This is likely because acetylated tubulin can stabilize microtubule structures, which in  
236 turn implies that microtubule structure stabilization can also increase gene transfection  
237 efficiency. Taken together, these findings strongly suggest that inhibition of the intact  
238 structure or dynamic nature of microtubules is important for increasing the efficiency of  
239 gene transfection.

240

241 ***Microtubule inhibitors affect selective autophagy pathways***

242 Our results showed that treatment of cells with colchicine or vinblastine increased  
243 transfection efficiency in a p62-dependent manner. However, it is difficult to attribute  
244 these observations to one particular cause. Since microtubules are major contributors to

245 the trafficking of several components in the endosomal/lysosomal pathway, it is logical  
246 to propose that these inhibitors may block the autophagy pathway. The role of  
247 microtubules in autophagosome formation appears to be different based on the culture  
248 medium conditions, e.g., vegetatively growing medium (basal) or starvation medium  
249 (inducible) conditions. Several studies have used microtubule inhibitors under basal  
250 conditions to show that microtubules do not participate in autophagosome formation<sup>24-</sup>  
251 <sup>26</sup>. However, under inducible conditions, disassembling the microtubules with these  
252 inhibitors prevented autophagosome formation, suggesting that the role of microtubules  
253 is crucial in this step<sup>25, 27</sup>. Previous studies have shown that transfected DNA also  
254 induces the selective autophagy pathway<sup>4, 9, 11</sup>; hence, microtubule inhibitors may affect  
255 transfection-induced autophagosome formation. The detailed mechanisms of the  
256 inhibition of autophagosome formation following microtubule inhibitor treatment are  
257 not clear; however, several autophagy factors are associated with microtubules,  
258 including ATG8 (LC3), ATG1 (ULK1), ATG6 (Beclin1), ATG18 (WIP1), and p62<sup>28</sup>.  
259 LC3 has long been thought to be involved in the regulation of the assembly and  
260 disassembly of microtubules<sup>29, 30</sup>. Furthermore, ATG18-positive pre-autophagosomal  
261 structures can move along microtubules, and this movement is highly sensitive to  
262 microtubule inhibitor treatment<sup>31</sup>. These data suggest that microtubules contribute to the  
263 sequestration, recruitment, and movement of autophagy factors for the formation of the  
264 inducible autophagosome. Therefore, microtubule inhibitors may block the inducible  
265 autophagy pathway, resulting in a decrease in the likelihood of DNA degradation and an  
266 increase in the transfection efficiency.

267

268 ***Microtubule inhibitors decrease the level of phosphorylated p62***

269 The ubiquitination of endosome membrane proteins surrounding exogenous material,  
270 such as transfected DNA, is the initial step in inducible selective autophagy<sup>11, 32, 33</sup>. In  
271 our study, treatment with colchicine or vinblastine delayed the recruitment of Ub  
272 proteins. This delay in recruitment is also caused by depletion of p62 or the mutation of  
273 the phosphorylation site at S405 of p62 (human S403)<sup>12</sup>. Since p62 has been reported as  
274 one of the microtubule-associated factors<sup>27</sup>, treatment with a microtubule inhibitor may  
275 affect p62-mediated Ub recruitment. Specifically, our results showed that p62 S405  
276 phosphorylation was significantly impaired by treatment with colchicine or vinblastine  
277 after transfection. p62 S405 is phosphorylated by kinases such as CK2 and TBK1<sup>34, 35</sup>.  
278 These kinases are also associated with tubulin<sup>36-39</sup>. After transfection, the recruitment of  
279 these kinases may be affected by treatment with microtubule inhibitors. Further studies  
280 are necessary to elucidate the detailed mechanisms by which these microtubule  
281 inhibitors can affect the phosphorylation levels of p62.

282 In this study, a non-biased high-throughput screening method demonstrated  
283 that microtubule inhibitors enhanced transfection efficiency in a p62-dependent manner.  
284 This indicates that p62 function is associated with microtubule structure, and this  
285 function is critical for the control of transfection efficiency.

286

## 287 ***Materials and Methods***

### 288 ***Plasmids***

289 The pGL4.50 [*luc2*/CMV/Hygro] vector (NCBI Accession: EU921840.1), which  
290 encodes the luciferase reporter gene *luc2*, was used as a luciferase expression vector and  
291 named pCMV-Luc (E1310; Promega, Madison, WI, USA). The GFP expression

292 plasmid pCMX-AFAP was prepared as previously described<sup>40</sup>. pBABE-puro was  
293 purchased from Addgene (1764; Addgene, Cambridge, MA, USA).

294 To create the PB-CMV-LUC-Zeo vector, we first constructed the PB-EF1-MCS-  
295 IRES-Zeo vector. To insert the zeocin resistance gene DNA sequence, two DNA  
296 fragments (#1 and #2) were amplified as follows: the cloning site with Kozak sequence  
297 fragment #1 was amplified from the PB-EF1-MCS-IRES-Neo vector (PB533A-2;  
298 System Biosciences, Palo Alto, CA, USA) using PCR and the following primers: 5'-  
299 CTGAAGGATGCCAGAAAGGTACCCATTGT-3' and 5'-  
300 TCCGGACGCCATGGTTGTGG-3'. The zeocin cord fragment #2 was amplified from  
301 the pcDNA3.1/Zeo(+) vector (V86020; Thermo Fisher Scientific, Yokohama, Japan)  
302 using PCR and the following primers: 5'-  
303 ACAACCATGGCGTCCGGAATGGCCAAGTTGACCAGTGCCGTTCC-3' and 5'-  
304 TCCAGAGGTTGATTGTCGACTCAGTCCTGCTCCTCGGCCACGAA-3'.  
305 Following digestion with KpnI and Sall, fragments #1 and #2 were inserted into the PB-  
306 EF1-MCS-IRES-Neo vector using the In-Fusion HD Cloning Kit (639648; Takara Bio  
307 Inc. Kusatsu, Japan.). This resulted in the PB-EF1-MCS-IRES-Zeo vector.

308 Next, the human cytomegalovirus immediate early enhancer and promoter  
309 (CMV-IE) DNA sequence (#3) was amplified from the pGL4.50 [*luc2*/CMV/Hygro]  
310 vector using PCR and the following primers: 5'-  
311 GGGGATACGGGGAAAAGGCCTCGTTACATAACTTACGGTAAATG-3' and 5'-  
312 GAATTCGCTAGCTCTAGAAGCTCTGCTTATATAGACCTCCCACC-3'. The  
313 luciferase DNA sequence (#4) was amplified from the pGL4.50 [*luc2*/CMV/Hygro]  
314 vector using PCR and the following primers: 5'-  
315 TCTAGAGCTAGCGAATTCATGGAAGATGCCAAAACATTAAGAA-3'

316 and 5'-CGATTTAAATTCGAATTCTTACACGGCGATCTTGCCGCCCTTCT-3'.  
317 Following digestion with EcoRI and StuI, fragments #3 and #4 were inserted into the  
318 PB-EF1-MCS-IRES-Zeo vector using the In-Fusion HD Cloning Kit. This resulted in  
319 the PB-CMV-LUC-Zeo vector.

320

### 321 *Cell Strains*

322 p62KO-MEF cells (p62<sup>-/-</sup> cells) and their parental MEF cells were kindly provided by  
323 Dr. Tetsuro Ishii (University of Tsukuba)<sup>41</sup>. MEF cells stably expressing GFP-Ub were  
324 generated as previously described<sup>12</sup>. Briefly, to obtain MEF cells or p62KO-MEF cells  
325 stably expressing luciferase, MEF cells or p62KO-MEF cells were transfected with the  
326 PB-CMV-LUC-Zeo plasmid and cultured in the presence of 100 µg/mL Zeocin  
327 (R25501, Thermo Fisher Scientific), and then single clones (MEF-LUC cells) were  
328 selected. Each stable clone was examined for luciferase protein expression using a  
329 luciferase reporter gene assay.

330

### 331 *Cell Culture*

332 All cell lines were maintained in Dulbecco's Modified Eagle Medium (DMEM)  
333 (D6429; Sigma-Aldrich, St. Louis, MO, USA) supplemented with 10% fetal bovine  
334 serum in the presence of 5% CO<sub>2</sub> at 37°C.

335

### 336 *High-Throughput Screening for enhancer compounds*

337 MEF cells were seeded at a density of  $0.8 \times 10^3$  cells per well (384-well microplate,  
338 781091; Greiner Bio-One, Tokyo, Japan) using a Multidrop COMBI (Thermo Fisher  
339 Scientific), and incubated in culture medium for 6 h. The cells were treated with 1%

340 DMSO (negative control) or the screening compounds (10  $\mu$ M each) using Fluent780®  
341 Automation Workstation (Tecan Japan, Kawasaki, Japan) with a 96-channel head  
342 adapter and Tecan sterile tips (30048824; Tecan Japan). After 16 h, the cells were  
343 transfected with 25 ng of pCMV-Luc plasmid using Lipofectamine 2000 (Thermo  
344 Fisher Scientific) according to the manufacturer's protocol. The cells were then  
345 incubated for 28 h, followed by measurement of cell viability with the RealTime-Glo™  
346 MT Cell Viability Assay (E9713; Promega) using the GloMax® Discover Microplate  
347 Reader (Promega). Luciferase activity was measured with the ONE-Glo™ Luciferase  
348 Assay System (E6120; Promega) using the GloMax® Discover Microplate Reader.

349

### 350 *Luciferase Assays*

351 Cells were seeded at a density of  $0.45 \times 10^4$  cells per well (96-Well Assay Plate; 3603  
352 Corning, Corning, NY, USA) and incubated in culture medium for 6 h. The cells were  
353 treated with 1% DMSO (negative control) or the screening compounds (0.1–10  $\mu$ M  
354 each). After 16 h, the cells were transfected with 100 ng of pCMV-Luc plasmid using  
355 Lipofectamine 2000 according to the manufacturer's protocol. The cells were then  
356 incubated for 28 h, followed by measurement of cell viability with the RealTime-Glo™  
357 MT Cell Viability Assay to normalize cell number using the GloMax™ 96 Microplate  
358 Luminometer (Promega). Luciferase activity was measured with the ONE-Glo™  
359 Luciferase Assay System using the GloMax™ 96 Microplate Luminometer. The mean  
360 EC50 values and standard deviations were determined from three independent  
361 experiments.

362

### 363 *Preparation of pHrodo-conjugated Beads*



364 pHrodo-conjugated beads were prepared as previously described<sup>16</sup>. Briefly, Dynabeads  
365 M-270 Streptavidin (DB65306; Thermo Fisher Scientific) were washed three times with  
366 phosphate buffered saline (PBS) and resuspended in 100 mM sodium bicarbonate buffer  
367 (pH 8.5) to an appropriate concentration (typically a 1:10 or 1:20 dilution). pHrodo-  
368 succinimidyl ester (P36600; Thermo Fisher Scientific) was then added to the bead  
369 suspension and incubated in sodium bicarbonate buffer for 1 h at room temperature  
370 (about 26°C). After the conjugation reaction, the beads were washed with sodium  
371 bicarbonate buffer and suspended in PBS.

372

### 373 *Incorporation of Beads into Living Cells*

374 Beads were incorporated into cells as previously described<sup>17</sup>. One day before  
375 incorporating the beads, GFP-Ub MEF cells were seeded onto 35-mm glass-bottom  
376 culture dishes (P35G-1.5-10-C; MatTek, Ashland, MA, USA) at a density of  $1.5 \times 10^5$   
377 cells/dish in culture medium. Transfection-reagent-coated beads were prepared by  
378 mixing pHrodo-conjugated beads with Effectene transfection reagent (301425; Qiagen,  
379 Tokyo, Japan) according to the manufacturer instructions, except that the bead  
380 suspension was used instead of DNA solution. The resulting bead mixture (~10  $\mu$ L) was  
381 mixed with 90  $\mu$ L of the culture medium and added to the cells by replacing the  
382 medium. After incubation for 1 h at 37°C in a CO<sub>2</sub> incubator, the cells were washed  
383 twice with fresh growth medium to remove unattached beads and then further incubated  
384 for the time indicated in each experiment.

385

### 386 *Time-Lapse Imaging*

387 Cells were treated with 100 ng/mL Hoechst33342 (B2261; Sigma-Aldrich) for 15 min  
388 to stain chromosomes, as previously described<sup>42</sup>. After replacing the culture medium  
389 with fresh medium not containing phenol red, time-lapse observation was performed  
390 using an oil-immersion objective lens (UApo40/NA1.35; Olympus, Tokyo, Japan) on a  
391 DeltaVision microscope system (GE Healthcare Life Sciences Japan, Tokyo, Japan)  
392 placed in a temperature-controlled room (37°C), as previously described<sup>42</sup>. Images were  
393 obtained every minute for ~60 min.

394

### 395 ***Western Blot Analysis***

396 Western blot analysis was performed as previously described<sup>12</sup>. Briefly, cell lysates  
397 were prepared in a lysis buffer [50 mM Tris-HCl, pH 7.5, 150 mM NaCl, 1 mM EDTA,  
398 1% Triton X-100, 1 x Phosphatase Inhibitor Cocktail Solution II (160-24371;  
399 FUJIFILM Wako Pure Chemical Corporation, Osaka, Japan) and 1 x protease inhibitor  
400 cocktail (Nacalai tesque Inc., Kyoto, Japan)]. The lysates were subjected to  
401 electrophoresis on NuPAGE 4% to 12% Bis-Tris gels (NP0321; Thermo Fisher  
402 Scientific). Proteins were transferred to polyvinylidene fluoride membranes and probed  
403 using anti-p62(SQSTM1) (PM045; MBL, Nagoya, Japan), anti-Phospho-  
404 SQSTM1/p62(Ser403) (D8D6T; Cell Signaling Technology, Danvers, MA, USA), and  
405 anti-glyceraldehyde 3-phosphate dehydrogenase (GAPDH) (14C10; Cell Signaling  
406 Technology) antibodies, and secondary antibody conjugated to horseradish peroxidase  
407 (NA9340V; GE Healthcare Life Sciences). Protein bands were stained with  
408 ImmunoStar Zeta (295-72404; FUJIFILM Wako Pure Chemical Corporation) and  
409 detected by chemiluminescence using a ChemiDoc MP imaging system (Bio-Rad,  
410 Tokyo, Japan).

411

412 ***Statistical Analysis***

413 The *p*-values were obtained by performing Kruskal-Wallis tests using GraphPad Prism  
414 8 software (GraphPad Software, Inc., La Jolla, CA, USA).

415

416 ***Acknowledgments***

417 We are grateful to Dr. Eiji Warabi and Dr. Tetsuro Ishii (Tsukuba University) for  
418 providing p62KO-MEF cells and the corresponding wild-type MEF cells. We thank J.  
419 Iacona, Ph.D., from Edanz Group (<https://en-author-services.edanzgroup.com/ac>) for  
420 English-editing a draft of this manuscript. This study was supported by The JSPS  
421 Kakenhi Grant Numbers JP19K06488 to MT, JP19KK0218, JP20H05322 and  
422 JP20K07029 to HO, JP18H05533 to YH, and JP17K19505 and JP18H05528 to TH.  
423 This research was supported by Platform Project for Supporting Drug Discovery and  
424 Life Science Research (Basis for Supporting Innovative Drug Discovery and Life  
425 Science Research (BINDS)) from AMED under Grant Number JP20am0101084.

426

427 ***Author contributions***

428 MT, HO, KW, TK, CM, KN, BL and AT performed the experiments. MT, HO, AT,  
429 YH, and TH designed the experiments. All authors analyzed and discussed the data, and  
430 MT, HO, YH, and TH wrote the manuscript.

431

432 ***Conflict of Interest***

433 All authors declare that: (i) no support, financial or otherwise, has been received from  
434 any organization that may have an interest in the submitted work; and (ii) there are no  
435 other relationships or activities that could appear to have influenced the submitted work.  
436

437 **Reference**

- 438 1. Khalil, IA, Kogure, K, Akita, H, and Harashima, H (2006). Uptake pathways  
439 and subsequent intracellular trafficking in nonviral gene delivery. *Pharmacol*  
440 *Rev* **58**: 32-45.
- 441 2. Midoux, P, Breuzard, G, Gomez, JP, and Pichon, C (2008). Polymer-based gene  
442 delivery: a current review on the uptake and intracellular trafficking of  
443 polyplexes. *Curr Gene Ther* **8**: 335-352.
- 444 3. Rejman, J, Bragonzi, A, and Conese, M (2005). Role of clathrin- and caveolae-  
445 mediated endocytosis in gene transfer mediated by lipo- and polyplexes. *Mol*  
446 *Ther* **12**: 468-474.
- 447 4. Chen, X, Khambu, B, Zhang, H, Gao, W, Li, M, Chen, X, *et al.* (2014).  
448 Autophagy induced by calcium phosphate precipitates targets damaged  
449 endosomes. *J Biol Chem* **289**: 11162-11174.
- 450 5. Nakatogawa, H, Suzuki, K, Kamada, Y, and Ohsumi, Y (2009). Dynamics and  
451 diversity in autophagy mechanisms: lessons from yeast. *Nature reviews*  
452 *Molecular cell biology* **10**: 458-467.
- 453 6. Mizushima, N, Yoshimori, T, and Ohsumi, Y (2011). The role of Atg proteins in  
454 autophagosome formation. *Annu Rev Cell Dev Biol* **27**: 107-132.
- 455 7. Galluzzi, L, Baehrecke, EH, Ballabio, A, Boya, P, Bravo-San Pedro, JM,  
456 Cecconi, F, *et al.* (2017). Molecular definitions of autophagy and related  
457 processes. *The EMBO journal* **36**: 1811-1836.
- 458 8. Dupont, N, Temime-Smaali, N, and Lafont, F (2010). How ubiquitination and  
459 autophagy participate in the regulation of the cell response to bacterial infection.  
460 *Biology of the cell* **102**: 621-634.

- 461 9. Roberts, R, Al-Jamal, WT, Whelband, M, Thomas, P, Jefferson, M, van den  
462 Bossche, J, *et al.* (2013). Autophagy and formation of tubulovesicular  
463 autophagosomes provide a barrier against nonviral gene delivery. *Autophagy* **9**:  
464 667-682.
- 465 10. Alomairi, J, Bonacci, T, Ghigo, E, and Soubeyran, P (2015). Alterations of host  
466 cell ubiquitination machinery by pathogenic bacteria. *Frontiers in cellular and*  
467 *infection microbiology* **5**: 17.
- 468 11. Tsuchiya, M, Ogawa, H, Koujin, T, Kobayashi, S, Mori, C, Hiraoka, Y, *et al.*  
469 (2016). Depletion of autophagy receptor p62/SQSTM1 enhances the efficiency  
470 of gene delivery in mammalian cells. *FEBS letters* **590**: 2671-2680.
- 471 12. Tsuchiya, M, Ogawa, H, Koujin, T, Mori, C, Osakada, H, Kobayashi, S, *et al.*  
472 (2018). p62/SQSTM1 promotes rapid ubiquitin conjugation to target proteins  
473 after endosome rupture during xenophagy. *FEBS Open Bio* **8**: 470-480.
- 474 13. Tachibana, K, Yuzuriha, T, Tabata, R, Fukuda, S, Maegawa, T, Takahashi, R, *et*  
475 *al.* (2018). Discovery of peroxisome proliferator-activated receptor alpha  
476 (PPARalpha) activators with a ligand-screening system using a human  
477 PPARalpha-expressing cell line. *J Biol Chem* **293**: 10333-10343.
- 478 14. Rosette, C, and Karin, M (1995). Cytoskeletal control of gene expression:  
479 depolymerization of microtubules activates NF-kappa B. *The Journal of cell*  
480 *biology* **128**: 1111-1119.
- 481 15. Wang, L, and MacDonald, RC (2004). Effects of microtubule-depolymerizing  
482 agents on the transfection of cultured vascular smooth muscle cells: enhanced  
483 expression with free drug and especially with drug-gene lipoplexes. *Mol Ther* **9**:  
484 729-737.

- 485 16. Kobayashi, S, Kojidani, T, Osakada, H, Yamamoto, A, Yoshimori, T, Hiraoka, Y,  
486 *et al.* (2010). Artificial induction of autophagy around polystyrene beads in  
487 nonphagocytic cells. *Autophagy* **6**: 36-45.
- 488 17. Kobayashi, S, Koujin, T, Kojidani, T, Osakada, H, Mori, C, Hiraoka, Y, *et al.*  
489 (2015). BAF is a cytosolic DNA sensor that leads to exogenous DNA avoiding  
490 autophagy. *Proceedings of the National Academy of Sciences of the United*  
491 *States of America* **112**: 7027-7032.
- 492 18. Lindberg, J, Fernandez, MA, Ropp, JD, and Hamm-Alvarez, SF (2001).  
493 Nocodazole treatment of CV-1 cells enhances nuclear/perinuclear accumulation  
494 of lipid-DNA complexes and increases gene expression. *Pharmaceutical*  
495 *research* **18**: 246-249.
- 496 19. Hasegawa, S, Hirashima, N, and Nakanishi, M (2001). Microtubule involvement  
497 in the intracellular dynamics for gene transfection mediated by cationic  
498 liposomes. *Gene Ther* **8**: 1669-1673.
- 499 20. Nair, RR, Rodgers, JR, and Schwarz, LA (2002). Enhancement of transgene  
500 expression by combining glucocorticoids and anti-mitotic agents during  
501 transient transfection using DNA-cationic liposomes. *Mol Ther* **5**: 455-462.
- 502 21. Barua, S, and Rege, K (2010). The influence of mediators of intracellular  
503 trafficking on transgene expression efficacy of polymer-plasmid DNA  
504 complexes. *Biomaterials* **31**: 5894-5902.
- 505 22. Ho, YK, Zhou, LH, Tam, KC, and Too, HP (2017). Enhanced non-viral gene  
506 delivery by coordinated endosomal release and inhibition of beta-tubulin  
507 deacetylase. *Nucleic acids research* **45**: e38.
- 508 23. Vaughan, EE, Geiger, RC, Miller, AM, Loh-Marley, PL, Suzuki, T, Miyata, N, *et*

- 509 *al.* (2008). Microtubule acetylation through HDAC6 inhibition results in  
510 increased transfection efficiency. *Mol Ther* **16**: 1841-1847.
- 511 24. Aplin, A, Jasionowski, T, Tuttle, DL, Lenk, SE, and Dunn, WA, Jr. (1992).  
512 Cytoskeletal elements are required for the formation and maturation of  
513 autophagic vacuoles. *J Cell Physiol* **152**: 458-466.
- 514 25. Kochl, R, Hu, XW, Chan, EY, and Tooze, SA (2006). Microtubules facilitate  
515 autophagosome formation and fusion of autophagosomes with endosomes.  
516 *Traffic (Copenhagen, Denmark)* **7**: 129-145.
- 517 26. Reunanen, H, Marttinen, M, and Hirsimaki, P (1988). Effects of griseofulvin and  
518 nocodazole on the accumulation of autophagic vacuoles in Ehrlich ascites tumor  
519 cells. *Exp Mol Pathol* **48**: 97-102.
- 520 27. Geeraert, C, Ratier, A, Pfisterer, SG, Perdiz, D, Cantaloube, I, Rouault, A, *et al.*  
521 (2010). Starvation-induced hyperacetylation of tubulin is required for the  
522 stimulation of autophagy by nutrient deprivation. *J Biol Chem* **285**: 24184-  
523 24194.
- 524 28. Mackeh, R, Perdiz, D, Lorin, S, Codogno, P, and Pous, C (2013). Autophagy and  
525 microtubules - new story, old players. *Journal of cell science* **126**: 1071-1080.
- 526 29. Mann, SS, and Hammarback, JA (1994). Molecular characterization of light  
527 chain 3. A microtubule binding subunit of MAP1A and MAP1B. *J Biol Chem*  
528 **269**: 11492-11497.
- 529 30. Deretic, V (2008). Autophagosome and phagosome. *Methods Mol Biol* **445**: 1-  
530 10.
- 531 31. Polson, HE, de Lartigue, J, Rigden, DJ, Reedijk, M, Urbe, S, Clague, MJ, *et al.*  
532 (2010). Mammalian Atg18 (WIPI2) localizes to omegasome-anchored



- 533 phagophores and positively regulates LC3 lipidation. *Autophagy* **6**: 506-522.
- 534 32. Randow, F (2011). How cells deploy ubiquitin and autophagy to defend their  
535 cytosol from bacterial invasion. *Autophagy* **7**: 304-309.
- 536 33. Wileman, T (2013). Autophagy as a defence against intracellular pathogens.  
537 *Essays in biochemistry* **55**: 153-163.
- 538 34. Matsumoto, G, Shimogori, T, Hattori, N, and Nukina, N (2015). TBK1 controls  
539 autophagosomal engulfment of polyubiquitinated mitochondria through  
540 p62/SQSTM1 phosphorylation. *Human molecular genetics* **24**: 4429-4442.
- 541 35. Matsumoto, G, Wada, K, Okuno, M, Kurosawa, M, and Nukina, N (2011).  
542 Serine 403 phosphorylation of p62/SQSTM1 regulates selective autophagic  
543 clearance of ubiquitinated proteins. *Molecular cell* **44**: 279-289.
- 544 36. Faust, M, Schuster, N, and Montenarh, M (1999). Specific binding of protein  
545 kinase CK2 catalytic subunits to tubulin. *FEBS letters* **462**: 51-56.
- 546 37. Lim, AC, Tiu, SY, Li, Q, and Qi, RZ (2004). Direct regulation of microtubule  
547 dynamics by protein kinase CK2. *J Biol Chem* **279**: 4433-4439.
- 548 38. Pillai, S, Nguyen, J, Johnson, J, Haura, E, Coppola, D, and Chellappan, S  
549 (2015). Tank binding kinase 1 is a centrosome-associated kinase necessary for  
550 microtubule dynamics and mitosis. *Nature communications* **6**: 10072.
- 551 39. Yang, H, Mao, W, Rodriguez-Aguayo, C, Mangala, LS, Bartholomeusz, G, Iles,  
552 LR, *et al.* (2018). Paclitaxel Sensitivity of Ovarian Cancer Can be Enhanced by  
553 Knocking Down Pairs of Kinases that Regulate MAP4 Phosphorylation and  
554 Microtubule Stability. *Clin Cancer Res* **24**: 5072-5084.
- 555 40. Ogawa, H, Yu, RT, Haraguchi, T, Hiraoka, Y, Nakatani, Y, Morohashi, K, *et al.*  
556 (2004). Nuclear structure-associated TIF2 recruits glucocorticoid receptor and

- 557 its target DNA. *Biochemical and biophysical research communications* **320**:  
558 218-225.
- 559 41. Komatsu, M, Waguri, S, Koike, M, Sou, YS, Ueno, T, Hara, T, *et al.* (2007).  
560 Homeostatic levels of p62 control cytoplasmic inclusion body formation in  
561 autophagy-deficient mice. *Cell* **131**: 1149-1163.
- 562 42. Haraguchi, T, Kaneda, T, and Hiraoka, Y (1997). Dynamics of chromosomes and  
563 microtubules visualized by multiple-wavelength fluorescence imaging in living  
564 mammalian cells: effects of mitotic inhibitors on cell cycle progression. *Genes*  
565 *to cells : devoted to molecular & cellular mechanisms* **2**: 369-380.
- 566
- 567

568 **Figure Legends**

569 **Fig. 1. High-throughput screening for drugs enhancing transfection efficiency.**

570 (A) Schematic diagram of high-throughput screening system using luciferase reporter  
571 gene assay. A cell viability assay was performed using the RealTime-Glo™ MT Cell  
572 Viability Assay system. (B) MEF cells were treated overnight with 10 μM of each  
573 compound from the Osaka University compound library. DMSO was used for negative  
574 controls. Luciferase activity and cell viability were measured, and the results are  
575 plotted. Red broken lines represent the mean + 4 × SD of all negative control assay  
576 points.

577

578 **Fig. 2. Second screening of compounds selected in high-throughput screening.**

579 (A) MEF cells were treated for 16 h with 1 μM each of the top 87 compounds identified  
580 in the primary screen. DMSO was used for negative controls. The relative fold change  
581 in the luciferase activity of each compound is plotted. The activity of DMSO-treated  
582 cells is set as 1. The second and third columns are colchicine and vinblastine as  
583 indicated. (B) List of top 10 potential compounds for enhancement of transfection  
584 efficiency. (C) MEF cells were treated with the indicated concentrations of colchicine  
585 (left graph) or vinblastine (right graph). The cells were transfected with the pCMV-Luc  
586 plasmid and incubated for 24 h, after which reporter gene assays were performed.  
587 Luciferase activity was normalized to cell viability. Black thick bars and thin lines  
588 indicate the mean and SD, respectively, of at least three independent experimental  
589 results. (D) MEF cells (a, d), 250 nM colchicine-treated MEF cells (b, e), and 50 nM

590 vinblastine-treated MEF cells (c, f) were examined using fluorescence microscopy 24 h  
591 after transfection of a GFP-expressing plasmid (upper panels; GFP); the lower panels  
592 represent the corresponding bright-field (BF) images of the upper panels. Scale bar =  
593 250  $\mu\text{m}$ .

594

595 ***Fig. 3. Colchicine and vinblastine treated MEF cells do not enhance transfection***  
596 ***efficiency in the absence of p62.***

597 (A) p62KO-MEF cells were treated for 16 h with 1  $\mu\text{M}$  each of the top 87 compounds  
598 identified in the primary screen. DMSO was used for negative controls. The relative  
599 fold change in the luciferase activity of each compound is plotted. The activity of  
600 DMSO-treated cells is set as 1. The right two columns are reproduced from Fig. 2A for  
601 comparison. (B, C) p62KO-MEF cells were treated with the indicated concentrations of  
602 (B) colchicine or (C) vinblastine. These stable cell lines were incubated for 43 h, after  
603 which reporter gene assays were performed. Luciferase activity was normalized to cell  
604 viability. Each value is indicated as the mean  $\pm$  SD of at least three independent  
605 experimental results.

606

607 ***Fig 4. Colchicine and vinblastine treated MEF cells affect the timing of***  
608 ***ubiquitination.***

609 (A) Schematic diagram of experimental system using beads incorporated into cells to  
610 monitor behavior of transfected materials. (B, C) Time-lapse images of pHrodo and

611 GFP-Ub fluorescence around a single pHrodo bead in MEF cells. Images were obtained  
612 every minute for approximately 60 min. The panels show representative images of  
613 pHrodo and GFP-Ub fluorescence in (B) GFP-Ub MEF cells treated with DMSO as a  
614 control and (C) GFP-Ub MEF cells treated with 500 nM colchicine. Scale bar = 2  $\mu$ m.  
615 (D) Statistical analysis was performed for the timing of GFP-signal accumulation  
616 around the beads after the loss of pHrodo signals in the GFP-Ub MEF cells. The results  
617 are plotted as follows: mock control treated with DMSO (lane 1), 100 nM colchicine-  
618 treated MEF cells (lane 2), 500 nM colchicine-treated MEF cells (lane 3), and 100 nM  
619 vinblastine-treated MEF cells (lane 4). The median values were 4 min for GFP-Ub ( $n$  =  
620 24 beads), 6 min for 100 nM colchicine ( $n$  = 28 beads), 6 min for 500 nM colchicine ( $n$   
621 = 22 beads), and 6 min for 100 nM vinblastine ( $n$  = 31 beads). Three independent  
622 experiments were performed for each lane and the total bead number is indicated as  $n$ .  
623 Statistical differences ( $p < 0.0001$ ) were determined using the Kruskal–Wallis test.  
624 Error bars indicate 95% confidence intervals.

625

626 ***Fig. 5. Colchicine and vinblastine treated MEF cells decrease the level of***  
627 ***phosphorylated p62 at S405.***

628 Western blot analysis was performed for total p62 and S405-phosphorylated p62 in  
629 MEF cells under the indicated conditions. GAPDH was used as a loading control.

630

**Fig. 1**

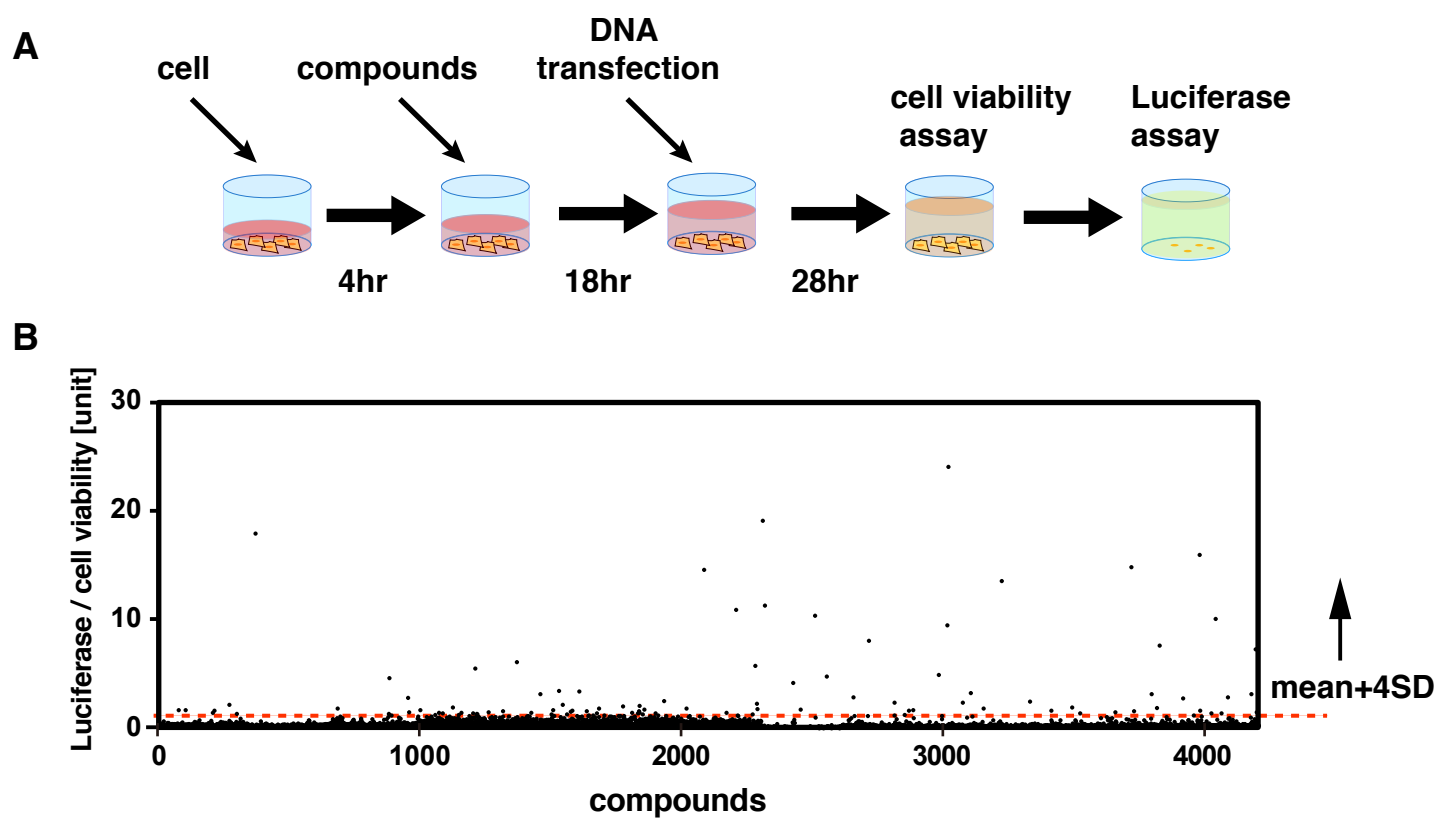

## Fig. 2

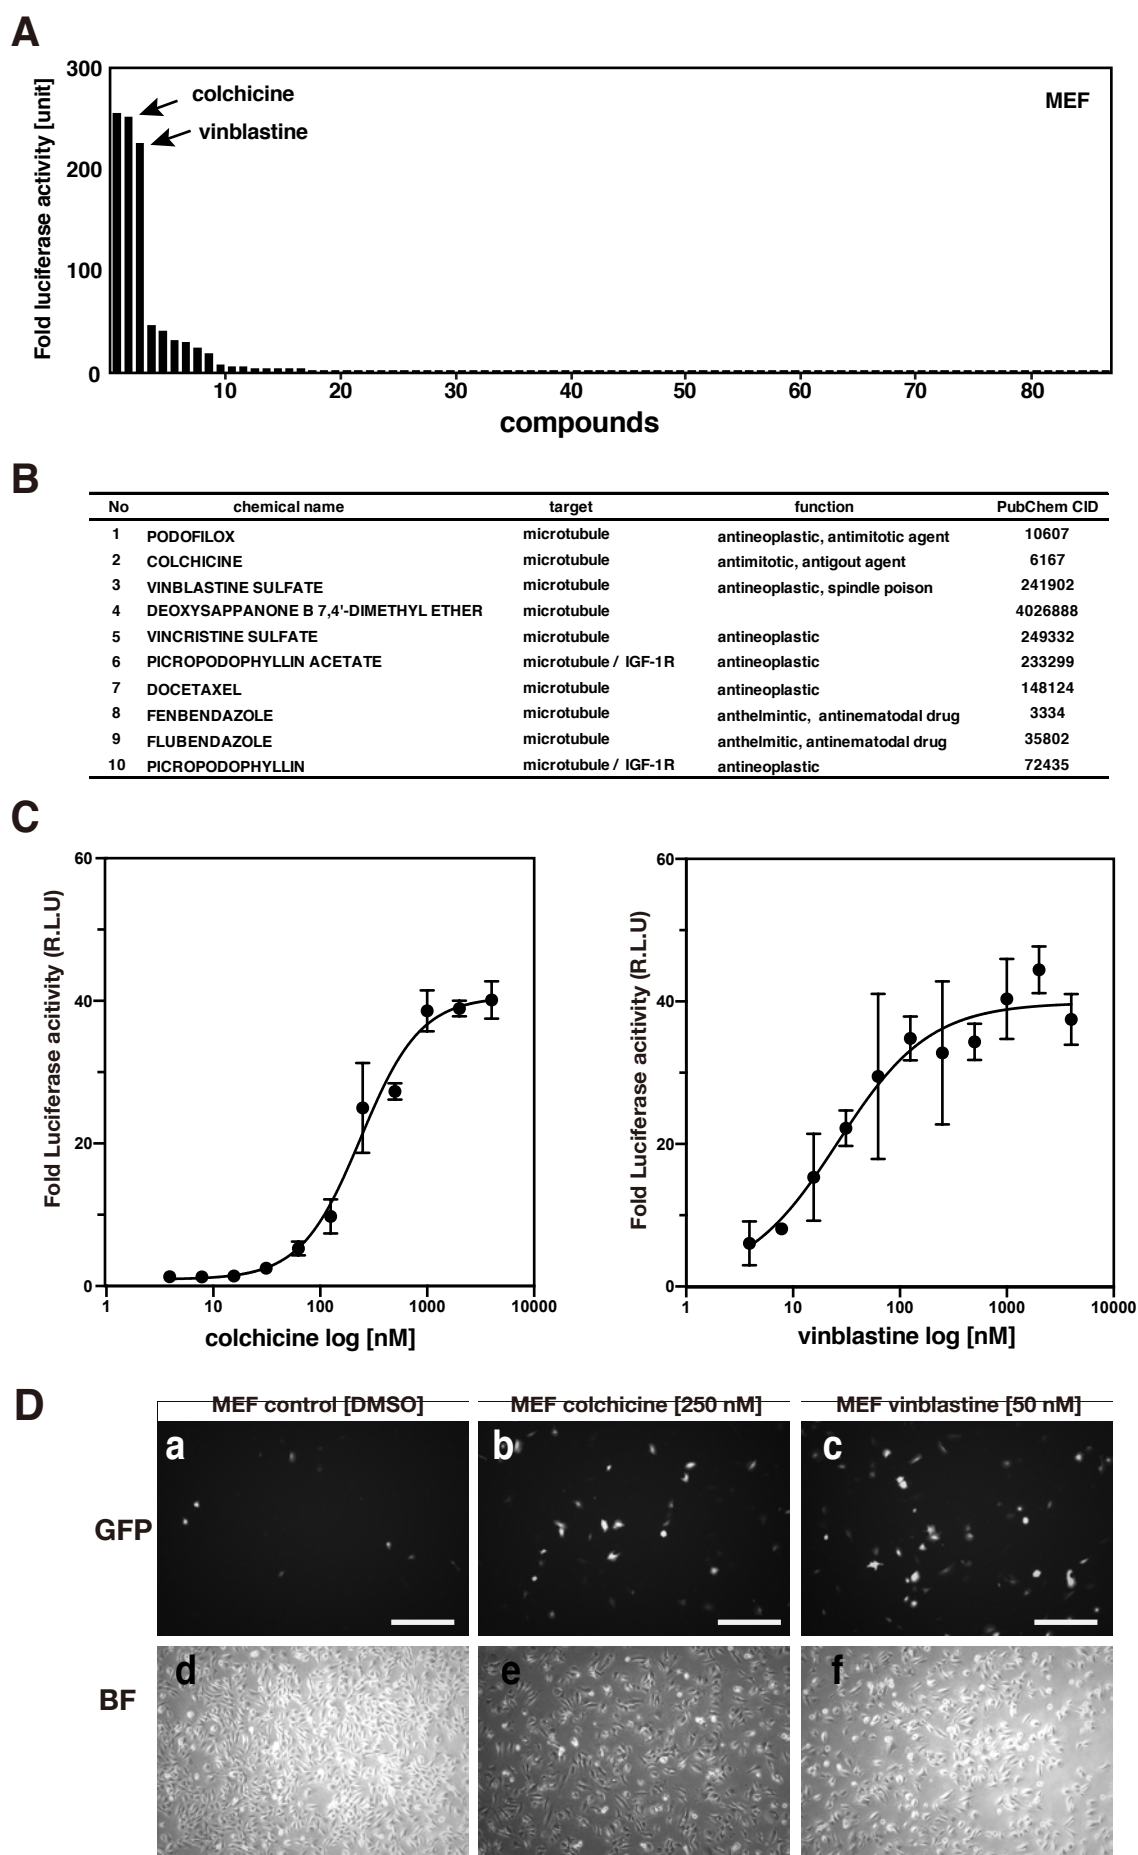

**Fig. 3**

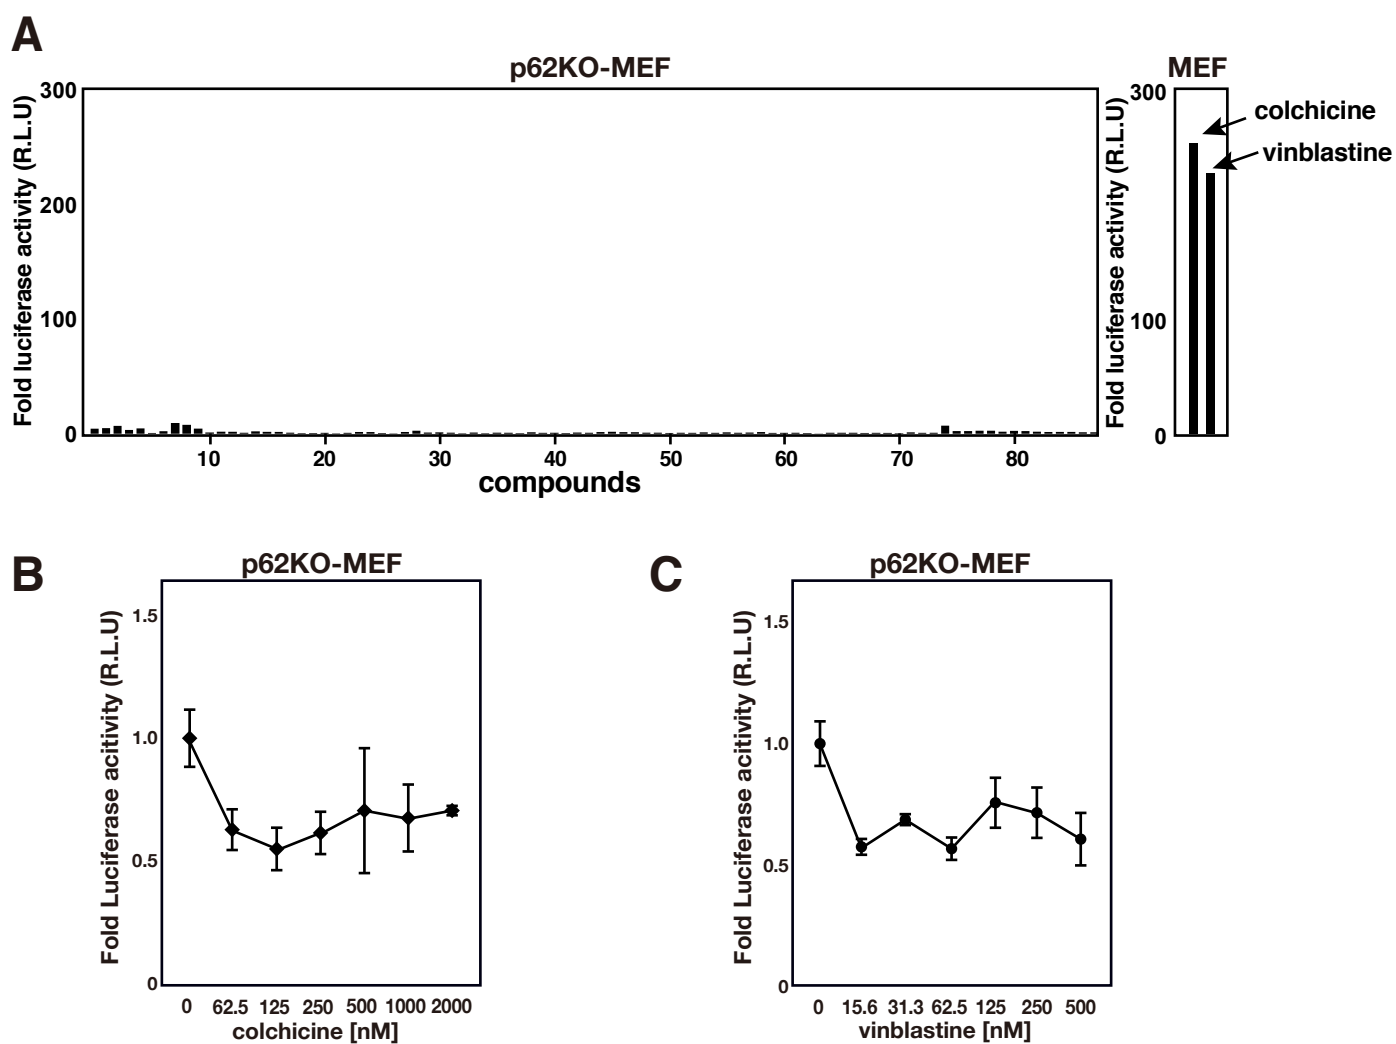



# Fig. 4

bioRxiv preprint doi: <https://doi.org/10.1101/2021.05.13.443985>; this version posted May 13, 2021. The copyright holder for this preprint (which was not certified by peer review) is the author/funder, who has granted bioRxiv a license to display the preprint in perpetuity. It is made available under aCC-BY-NC-ND 4.0 International license.

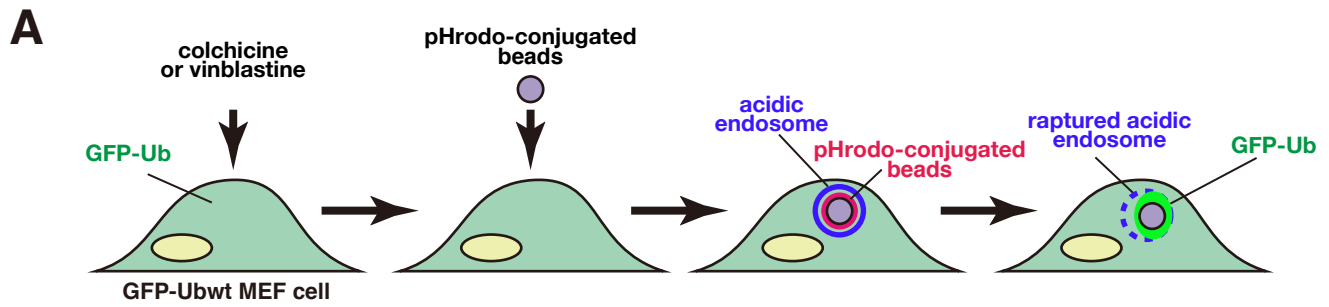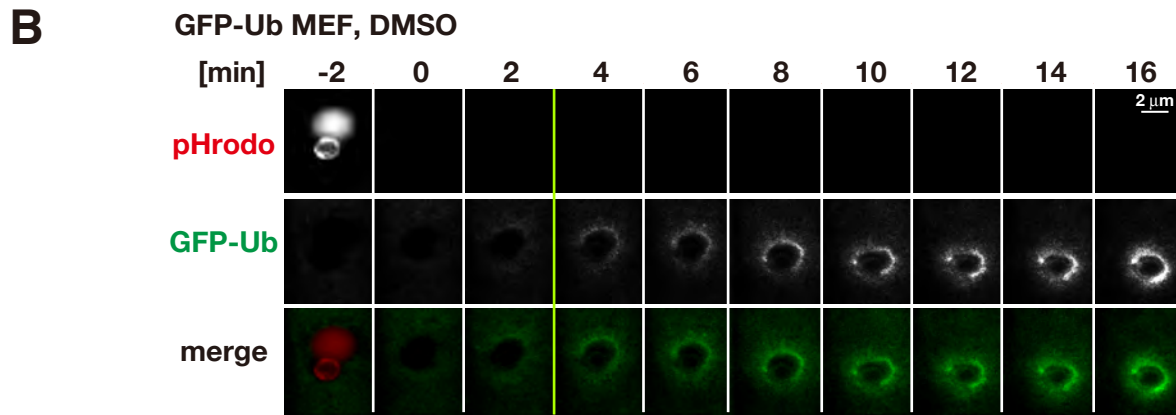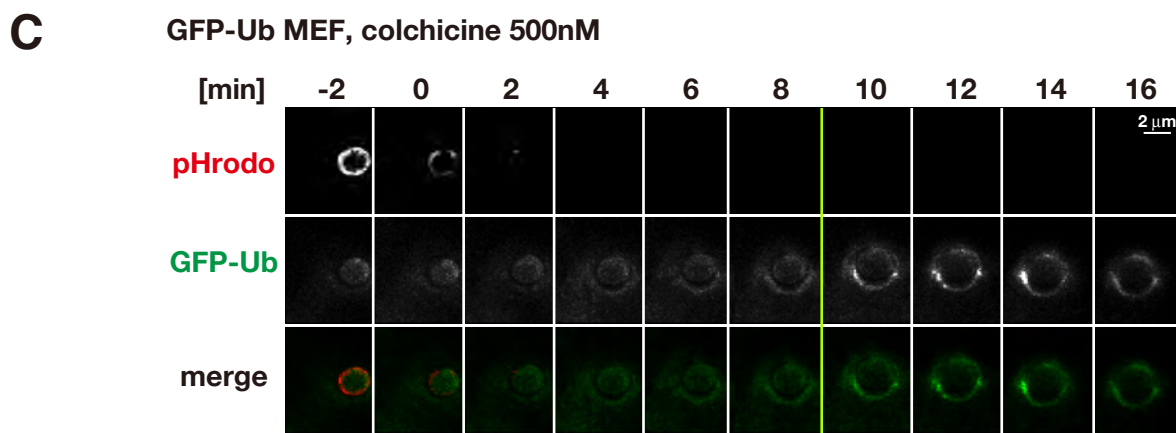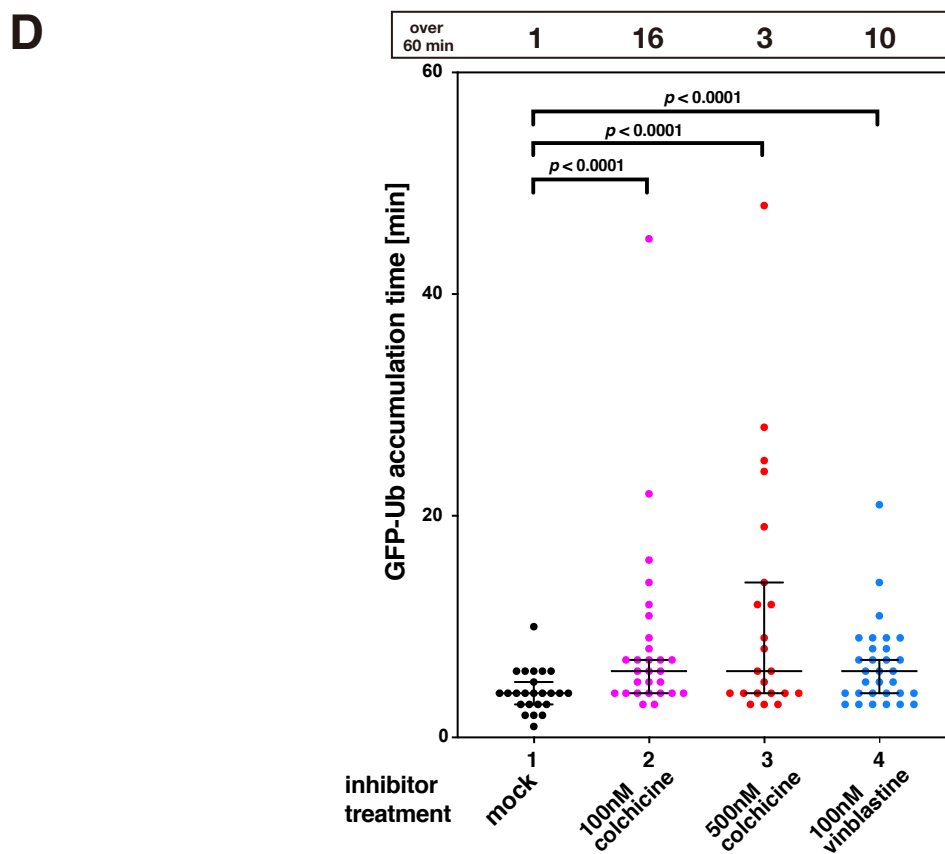

**Fig. 5**

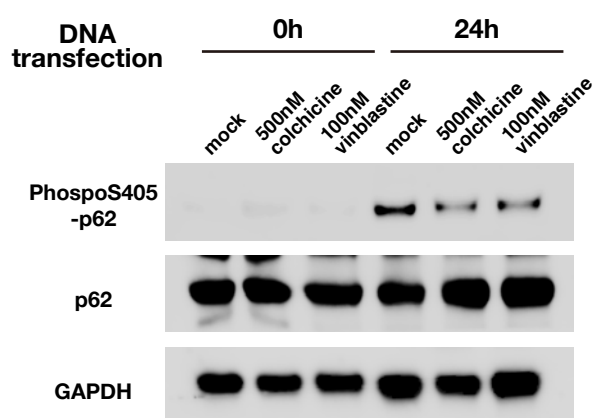

Table S1. Identification of 87 potential compounds for enhancement of transfection efficiency.

| Rank | Structure                                                                           | Name                                        | Formula                  | Fold activity in MEF | Fold activity in p62KO-MEF |
|------|-------------------------------------------------------------------------------------|---------------------------------------------|--------------------------|----------------------|----------------------------|
| 1    | 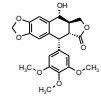   | PODOFILOX                                   | C22 H22 O8               | 297.24               | 4.46                       |
| 2    |    | COLCHICINE                                  | C22 H25 N O6             | 294.20               | 4.94                       |
| 3    |    | VINBLASTINE SULFATE                         | C46 H58 N4 O9 · H2 O4 S  | 263.07               | 6.90                       |
| 4    |    | DEOXSAPPANONE B 7,4'-DIMETHYL ETHER         | C18 H18 O5               | 54.43                | 4.72                       |
| 5    |    | VINCRISTINE SULFATE                         | C46 H56 N4 O10 · H2 O4 S | 46.77                | 0.66                       |
| 6    |   | PICROPODOPHYLLIN ACETATE                    | C24 H24 O9               | 35.46                | 2.19                       |
| 7    |  | DOCETAXEL                                   | C43 H53 N O14 · 3 H2 O   | 33.78                | 9.43                       |
| 8    |  | FENBENDAZOLE                                | C15 H13 N3 O2 S          | 27.14                | 7.83                       |
| 9    |  | FLUBENDAZOLE                                | C17 H13 F N2 O3          | 21.35                | 4.53                       |
| 10   |  |                                             | C18 H19 Cl F N O2        | 8.77                 | 1.09                       |
| 11   |  |                                             | C18 H17 N O2 S2          | 6.80                 | 1.80                       |
| 12   |  |                                             | C15 H26 N4 O5 S2         | 6.19                 | 1.70                       |
| 13   |  | OXIBENDAZOLE                                | C12 H15 N3 O3            | 4.64                 | 0.85                       |
| 14   |  | DEOXSAPPANONE B 7,3'-DIMETHYL ETHER ACETATE | C20 H20 O6               | 4.50                 | 2.07                       |
| 15   |  | PHENETHYL CAFFEATE (CAPE)                   | C17 H16 O4               | 4.44                 | 1.63                       |

|    |                                                                                     |                                     |                          |      |      |
|----|-------------------------------------------------------------------------------------|-------------------------------------|--------------------------|------|------|
| 16 | 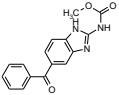   | MEBENDAZOLE                         | C16 H13 N3 O3            | 3.01 | 1.57 |
| 17 |    | AZACITIDINE                         | C8 H12 N4 O5             | 2.92 | 0.93 |
| 18 |    |                                     | C15 H10 Br F N2 O2       | 2.84 | 0.53 |
| 19 |    |                                     | C15 H18 N4 O3            | 2.52 | 0.62 |
| 20 |    | PIROCTONE OLAMINE                   | C14 H23 N O2 . C2 H7 N O | 2.04 | 0.78 |
| 21 |    |                                     | C18 H16 N2               | 1.96 | 0.38 |
| 22 |    |                                     | C25 H21 N3 O5 S          | 1.91 | 0.76 |
| 23 |   |                                     | C15 H29 N3 O2            | 1.82 | 1.52 |
| 24 |  | ISOOSAJIN                           | C25 H24 O5               | 1.59 | 1.50 |
| 25 |  | ALBENDAZOLE                         | C12 H15 N3 O2 S          | 1.50 | 0.62 |
| 26 |  | PICROPODOPHYLLIN                    | C22 H22 O8               | 1.49 | 0.32 |
| 27 |  | DEGUELIN(-)                         | C23 H22 O6               | 1.44 | 1.51 |
| 28 |  | EPOXYGEDUNIN                        | C28 H34 O8               | 1.37 | 2.66 |
| 29 |  | NISOLDIPINE                         | C20 H24 N2 O6            | 1.32 | 1.05 |
| 30 |  | METHYLPREDNISOLONE SODIUM SUCCINATE | C26 H33 O8 . Na          | 1.30 | 1.24 |
| 31 |  | METERGOLINE                         | C25 H29 N3 O2            | 1.29 | 0.93 |
| 32 |  | THIOGUANINE                         | C5 H5 N5 S               | 1.28 | 0.45 |

|    |                                                                                     |                          |                   |      |      |
|----|-------------------------------------------------------------------------------------|--------------------------|-------------------|------|------|
| 33 | 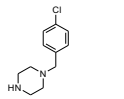   |                          | C11 H15 Cl N2     | 1.26 | 1.02 |
| 34 |    | TOLONIUM CHLORIDE        | C15 H16 N3 S . Cl | 1.24 | 0.49 |
| 35 |    | MANIDIPINE HYDROCHLORIDE | C35 H38 N4 O6     | 1.22 | 0.90 |
| 36 |    | PREGNENOLONE SUCCINATE   | C25 H36 O5        | 1.20 | 0.85 |
| 37 |    |                          | C12 H13 Br N4 O S | 1.15 | 0.56 |
| 38 |    | MOMETASONE FUROATE       | C27 H30 Cl2 O6    | 1.14 | 1.26 |
| 39 |    | ESTRAMUSTINE             | C23 H31 Cl2 N O3  | 1.08 | 0.79 |
| 40 |   | PHENOLPHTHALEIN          | C20 H14 O4        | 1.07 | 0.86 |
| 41 |  | BROXYQUINOLINE           | C9 H5 Br2 N O     | 1.07 | 0.63 |
| 42 |  |                          | C19 H30 Cl N O2   | 1.06 | 1.04 |
| 43 |  | PHENOTHIAZINE            | C12 H9 N S        | 1.05 | 0.86 |
| 44 |  | PEUCENIN                 | C15 H16 O4        | 1.05 | 1.45 |
| 45 |  | GANGALEOIDIN             | C18 H14 Cl2 O7    | 1.04 | 1.71 |
| 46 |  | 7,3'-DIMETHOXYFLAVONE    | C17 H14 O4        | 1.01 | 1.43 |
| 47 |  | 3-ACETYLGEDUNOL          | C30 H40 O8        | 1.00 | 1.37 |
| 48 |  | GARCINOLIC ACID          | C38 H46 O9        | 0.99 | 0.88 |
| 49 |  |                          | C12 H12 N6 S2     | 0.97 | 0.94 |

|    |                                                                                     |                                |                                 |      |      |
|----|-------------------------------------------------------------------------------------|--------------------------------|---------------------------------|------|------|
| 50 | 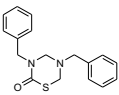   | SULBENTINE                     | C17 H18 N2 O S                  | 0.92 | 0.63 |
| 51 |    |                                | C16 H16 Cl N3 O S               | 0.92 | 0.85 |
| 52 |    | ISRADIPINE                     | C19 H21 N3 O5                   | 0.90 | 0.80 |
| 53 |    | DIHYDROGEDUNIN                 | C28 H36 O7                      | 0.90 | 1.23 |
| 54 |    | NITRENDIPINE                   | C18 H20 N2 O6                   | 0.88 | 0.82 |
| 55 |    | GEDUNIN                        | C28 H34 O7                      | 0.87 | 1.23 |
| 56 |    | PYRONARIDINE<br>TETRAPHOSPHATE | C29 H32 Cl N5 O2 .<br>4 H3 O4 P | 0.87 | 0.83 |
| 57 |   | BENAZEPRIL<br>HYDROCHLORIDE    | C24 H28 N2 O5 . Cl<br>H         | 0.86 | 1.06 |
| 58 |  | PYRVINIUM PAMOATE              | C26 H28 N3 . C23<br>H15 O6      | 0.85 | 1.46 |
| 59 |  |                                | C12 H12 N4 S                    | 0.83 | 0.70 |
| 60 |  |                                | C16 H13 N3 O S2                 | 0.82 | 0.80 |
| 61 |  | SODIUM TETRADECYL<br>SULFATE   | C14 H29 O4 S . Na               | 0.81 | 0.83 |
| 62 |  | DIENESTROL                     | C18 H18 O2                      | 0.81 | 0.61 |
| 63 |  | AMSACRINE                      | C22 H20 N2 O3 S                 | 0.81 | 0.18 |
| 64 |  | BISMUTH<br>SUBSALICYLATE       | C7 H5 Bi O4                     | 0.78 | 0.84 |
| 65 |  |                                | C20 H16 N2 O3 S                 | 0.78 | 0.86 |
| 66 |  | AMINOETHOXYDIPHEN<br>YLBORANE  | C14 H16 B N O                   | 0.76 | 0.88 |

|    |                                                                                     |                    |                    |      |      |
|----|-------------------------------------------------------------------------------------|--------------------|--------------------|------|------|
| 67 | 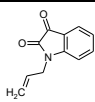   |                    | C11 H9 N O2        | 0.75 | 0.69 |
| 68 |    | OXFENDAZOLE        | C15 H13 N3 O3 S    | 0.73 | 0.80 |
| 69 |    | CHLOROXINE         | C9 H5 Cl2 N O      | 0.71 | 0.72 |
| 70 |    | DIETHYLSTILBESTROL | C18 H20 O2         | 0.66 | 0.45 |
| 71 |    | ESTRADIOL ACETATE  | C20 H26 O3         | 0.60 | 1.21 |
| 72 |    |                    | C23 H26 O3         | 0.55 | 0.81 |
| 73 |    |                    | C22 H17 N3 O3      | 0.44 | 0.86 |
| 74 |   |                    | C15 H18 N4 O3 S3   | 0.41 | 7.11 |
| 75 |  |                    | C14 H14 N4 O S3    | 0.07 | 2.33 |
| 76 |  |                    | C15 H10 F3 N3 S    | 0.07 | 2.35 |
| 77 |  |                    | C15 H17 N3 O3      | 0.07 | 2.67 |
| 78 |  |                    | C16 H10 Br Cl2 N5  | 0.06 | 2.62 |
| 79 |  |                    | C20 H23 N O4 S     | 0.06 | 1.80 |
| 80 |  |                    | C17 H10 Cl N O4    | 0.06 | 2.52 |
| 81 |  |                    | C17 H19 Br O3      | 0.06 | 2.36 |
| 82 |  |                    | C15 H13 Cl N2 O4 S | 0.05 | 1.75 |
| 83 |  |                    | C15 H14 Cl N3 O    | 0.04 | 1.52 |

|    |  |  |                              |      |      |
|----|--|--|------------------------------|------|------|
| 84 |  |  | C16 H13 Cl N4 O S2<br>. Cl H | 0.04 | 1.59 |
| 85 |  |  | C15 H13 Br N2 O2 S           | 0.03 | 1.58 |
| 86 |  |  | C14 H18 N6 O2 S              | 0.03 | 1.26 |
| 87 |  |  | C16 H18 N2 O2                | 0.03 | 1.27 |

Comparison of 87 compounds derived from the Osaka University compound library, showing their chemical structure, name, formula, and activity in 1  $\mu$ M of a 96-well luciferase assay in MEF cells and p62KO-MEF cells.



## Fig. S1

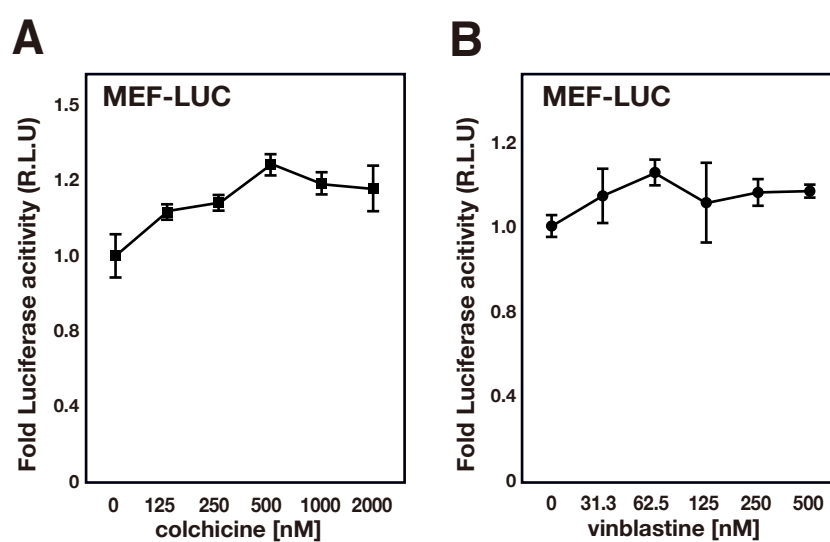

**Fig. S1. Colchicine and vinblastine treatments do not affect the promoter activity of the luciferase gene.**

(A, B) MEF cells stably expressing luciferase (MEF-LUC) were treated with the indicated concentrations of (A) colchicine or (B) vinblastine. After incubation for 43 h, the luciferase activity of the cells was measured and normalized to cell viability. Each value is indicated as the mean  $\pm$  SD of at least three independent experimental results.
